# Supplementary material
Source: PubMed Central journal article supplement (PMC4763338)
Supplement: NIHMS715744-supplement-Supplement_Table1.pdf [file NIHMS715744-supplement-Supplement_Table1.pdf]

| Patient ID                | Pathology               | HbT          |              |             | StO2         |              |             | Water        |              |             | Lipids       |              |             | TOI          |              |             |
|---------------------------|-------------------------|--------------|--------------|-------------|--------------|--------------|-------------|--------------|--------------|-------------|--------------|--------------|-------------|--------------|--------------|-------------|
|                           |                         | Norm         | Tum          | Ratio       |
| 49                        | IDC, high grade         | 10.17        | 11.30        | 1.11        | 44.71        | 38.33        | 0.86        | 44.88        | 71.65        | 1.60        | 20.25        | 36.09        | 1.78        | 22.53        | 22.42        | 1.00        |
| 25                        | IDC, high grade         | 14.92        | 14.45        | 0.97        | 60.97        | 58.04        | 0.95        | 37.02        | 40.76        | 1.10        | 57.58        | 65.84        | 1.14        | 9.59         | 8.94         | 0.93        |
| 54                        | IDC                     | 13.63        | 21.53        | 1.58        | 56.97        | 52.61        | 0.92        | 49.35        | 76.70        | 1.55        | 19.24        | 29.70        | 1.54        | 34.96        | 55.59        | 1.59        |
| 18                        | IDC                     | 13.03        | 9.47         | 0.73        | 42.01        | 48.60        | 1.16        | 31.33        | 29.19        | 0.93        | 15.68        | 32.91        | 2.10        | 26.03        | 8.40         | 0.32        |
| 31                        | IDC                     | 20.75        | 22.81        | 1.10        | 54.48        | 54.28        | 1.00        | 38.68        | 53.72        | 1.39        | 39.68        | 49.60        | 1.25        | 20.23        | 24.71        | 1.22        |
| 51                        | IDC                     | 14.38        | 18.19        | 1.26        | 47.11        | 42.38        | 0.90        | 56.69        | 78.84        | 1.39        | 16.98        | 24.85        | 1.46        | 48.01        | 57.73        | 1.20        |
| 4                         | IDC                     | 13.71        | 11.14        | 0.81        | 69.99        | 57.98        | 0.83        | 5.45         | 27.91        | 5.12        | 9.93         | 35.62        | 3.59        | 7.53         | 8.73         | 1.16        |
| 58                        | IDC                     | 26.19        | 36.85        | 1.41        | 64.46        | 67.52        | 1.05        | 37.86        | 56.59        | 1.49        | 36.06        | 52.16        | 1.45        | 27.50        | 39.98        | 1.45        |
| 28                        | IDC                     | 7.50         | 8.99         | 1.20        | 13.33        | 11.15        | 0.84        | 39.35        | 68.28        | 1.74        | 12.77        | 27.49        | 2.15        | 23.13        | 22.33        | 0.97        |
| 21                        | IDC                     | 8.33         | 9.61         | 1.15        | 33.49        | 32.79        | 0.98        | 45.73        | 68.70        | 1.50        | 15.41        | 28.89        | 1.87        | 24.73        | 22.86        | 0.92        |
| 48                        | IDC                     | 18.29        | 17.91        | 0.98        | 58.89        | 54.82        | 0.93        | 42.56        | 57.47        | 1.35        | 29.49        | 45.23        | 1.53        | 26.40        | 22.76        | 0.86        |
| 1                         | IDC                     | 9.25         | 10.61        | 1.15        | 49.91        | 51.14        | 1.02        | 53.80        | 61.00        | 1.13        | 0.00         | 0.00         | 0.00        | 0.00         | 0.00         | 0.00        |
| 23                        | IDC                     | 17.46        | 23.18        | 1.33        | 53.30        | 50.83        | 0.95        | 46.64        | 65.13        | 1.40        | 25.08        | 44.71        | 1.78        | 32.48        | 33.77        | 1.04        |
| 56                        | IDC                     | 19.94        | 18.99        | 0.95        | 61.11        | 58.86        | 0.96        | 39.38        | 46.88        | 1.19        | 43.30        | 54.31        | 1.25        | 18.13        | 16.39        | 0.90        |
| 61                        | IDC                     | 22.18        | 21.76        | 0.98        | 69.79        | 70.81        | 1.01        | 19.86        | 34.17        | 1.72        | 41.86        | 65.45        | 1.56        | 10.53        | 11.36        | 1.08        |
| 57                        | IDC                     | 16.99        | 15.56        | 0.92        | 56.13        | 55.27        | 0.98        | 46.20        | 44.63        | 0.97        | 55.97        | 55.35        | 0.99        | 14.03        | 12.55        | 0.89        |
| 55                        | IDC                     | 18.40        | 21.73        | 1.18        | 47.86        | 52.29        | 1.09        | 51.35        | 71.59        | 1.39        | 17.12        | 30.00        | 1.75        | 55.20        | 51.85        | 0.94        |
| 5                         | DC                      | 24.15        | 22.58        | 0.94        | 71.75        | 70.35        | 0.98        | 13.61        | 22.86        | 1.68        | 58.52        | 77.13        | 1.32        | 5.62         | 6.69         | 1.19        |
| 40                        | DC, low grade           | 16.93        | 16.92        | 1.00        | 52.31        | 54.31        | 1.04        | 60.43        | 71.06        | 1.18        | 26.17        | 27.87        | 1.06        | 39.08        | 43.16        | 1.10        |
| 30                        | after chemo, no residue | 13.20        | 13.76        | 1.04        | 46.07        | 41.61        | 0.90        | 47.07        | 71.36        | 1.52        | 19.08        | 32.38        | 1.70        | 32.56        | 30.33        | 0.93        |
| 36                        | after chemo, residue    | 8.72         | 9.26         | 1.06        | 11.47        | 10.82        | 0.94        | 75.26        | 101.96       | 1.35        | 15.37        | 19.18        | 1.25        | 42.69        | 49.21        | 1.15        |
| <b>Mean</b>               |                         | <b>15.63</b> | <b>16.98</b> | <b>1.09</b> | <b>50.77</b> | <b>49.28</b> | <b>0.97</b> | <b>42.02</b> | <b>58.12</b> | <b>1.56</b> | <b>27.41</b> | <b>39.75</b> | <b>1.55</b> | <b>24.81</b> | <b>26.18</b> | <b>0.99</b> |
| <b>Standard Deviation</b> |                         | <b>5.26</b>  | <b>6.82</b>  | <b>0.20</b> | <b>16.01</b> | <b>15.90</b> | <b>0.08</b> | <b>15.56</b> | <b>19.84</b> | <b>0.85</b> | <b>16.57</b> | <b>17.97</b> | <b>0.65</b> | <b>14.36</b> | <b>17.52</b> | <b>0.34</b> |
|                           |                         |              |              |             |              |              |             |              |              |             |              |              |             |              |              |             |
| Benign                    |                         | Norm         | Tum          | Ratio       |
| 35                        | Fibroadenoma            | 7.63         | 7.83         | 1.03        | 13.10        | 12.77        | 0.97        | 88.69        | 87.45        | 0.99        | 13.13        | 15.06        | 1.15        | 51.56        | 45.47        | 0.88        |
| 10                        | Fibroadenoma            | 26.11        | 16.06        | 0.62        | 80.19        | 72.17        | 0.90        | 15.01        | 21.26        | 1.42        | 64.27        | 79.79        | 1.24        | 6.10         | 4.28         | 0.70        |
| 26                        | Fibroadenoma            | 32.55        | 23.10        | 0.71        | 61.94        | 58.39        | 0.94        | 63.53        | 61.33        | 0.97        | 43.00        | 41.00        | 0.95        | 48.09        | 34.56        | 0.72        |
| 45                        | Fibroadenoma            | 31.89        | 24.50        | 0.77        | 61.36        | 62.19        | 1.01        | 51.21        | 60.07        | 1.17        | 30.04        | 38.20        | 1.27        | 54.36        | 38.52        | 0.71        |
| 20                        | Adenosis                | 12.26        | 11.52        | 0.94        | 20.45        | 21.06        | 1.03        | 73.61        | 38.93        | 0.53        | 17.04        | 15.36        | 0.90        | 52.94        | 29.20        | 0.55        |
| 6                         | Adenosis                | 47.36        | 15.35        | 0.32        | 78.43        | 63.06        | 0.80        | 20.78        | 22.22        | 1.07        | 47.93        | 47.76        | 1.00        | 20.53        | 7.14         | 0.35        |
| 39                        | Adenosis                | 12.64        | 15.25        | 1.21        | 59.61        | 57.06        | 0.96        | 40.89        | 64.95        | 1.59        | 14.09        | 30.82        | 2.19        | 36.68        | 32.13        | 0.88        |
| 46                        | Cystic hyperplasia      | 11.20        | 9.23         | 0.82        | 18.86        | 21.68        | 1.15        | 58.78        | 55.53        | 0.94        | 21.78        | 25.22        | 1.16        | 30.24        | 20.33        | 0.67        |
| 38                        | Intraductal papilloma   | 17.36        | 18.32        | 1.06        | 60.35        | 53.53        | 0.89        | 39.34        | 76.01        | 1.93        | 12.36        | 33.43        | 2.70        | 55.23        | 41.65        | 0.75        |
| <b>Mean</b>               |                         | <b>22.11</b> | <b>15.68</b> | <b>0.83</b> | <b>50.48</b> | <b>46.88</b> | <b>0.96</b> | <b>50.20</b> | <b>54.19</b> | <b>1.18</b> | <b>29.29</b> | <b>36.29</b> | <b>1.40</b> | <b>39.52</b> | <b>28.14</b> | <b>0.69</b> |
| <b>Standard Deviation</b> |                         | <b>13.21</b> | <b>5.71</b>  | <b>0.27</b> | <b>25.96</b> | <b>22.03</b> | <b>0.10</b> | <b>23.95</b> | <b>22.71</b> | <b>0.41</b> | <b>18.52</b> | <b>19.68</b> | <b>0.62</b> | <b>17.46</b> | <b>14.66</b> | <b>0.16</b> |

Supplemental Table 1
